# Supplementary material
Source: PubMed Central journal article supplement (PMC3076830)
Supplement: 1101439108_pnas.201101439SI.pdf [file 1101439108_pnas.201101439SI.pdf]

# Supporting Information

Wang et al. 10.1073/pnas.1101439108

## ADRB2 3'UTR

```
AGCAGTTTTTCTACTTTTAAAGACCCCCCCCCCAACAGAACACTAACAGACTATT
TAACTTGAGGGTAATAAACTTAGAATAAAATTGTAATAATTGTATAGAGATATGCAG
AAGGAAGGGCATCCTTCTGCCTTTTTTATTTTTTTAAGCTGTAAAAAGAGAGAAAAC
TTATTTGAGTGATTATTTGTTATTTGTACAGTTCAGTTCCTCTTTGCATGGAATTTGTA
AGTTTATGTCTAAAGAGCTTTAGTCCTAGAGGACCTGAGTCTGCTATATTTTCATGAC
TTTTCCATGTATCTACCTCACTATTCAAGTATTAGGGGTAATATATGCTGCTGGTAA
TTTGTATCTGAAGGAGATTTTCTTCTACACCCTTGGACTTGAGGATTTTGAGTATC
TCGGACCTTTCAGCTGTGAACATGGACTCTTCCCCACTCCTCTTATTTGCTCACACG
GGGTATTTTAGGCAGGGATTTGAGGAGCAGCTTCAGTTGTTTTCCCGAGCAAAGTCT
AAA GTTTACA GTAAATAAATTGTTTGACCATGCC
```

-  *let-7a,b,c,d,e,f,g,i/miR-98*
-  *miR-15a,b/16/195/424/497*
-  *miR-30a,b,c,d,e*

**Fig. S1.** MicroRNAs predicted to target the ADRB2 3' UTR. Using a combination of TargetScan, microRNA.org, Microcosm, and PicTar, *miR-15a,b/16/195/424/497* (blue) and *miR-30a,b,c,d,e* (green), in addition to the *let-7* (red) family, are predicted to target ADRB2 by the algorithms of at least three of the four programs.
